# Supplementary material
Source: publisher site journal article supplement (https://www.dovepress.com/article/254504)
Supplement: Supplementary file 1 [file get_supplementary_file.php]

Legends for supplemental files  
(In same order)

Figure S1: Novel miRNA (a) and fibrosis related miRNA(b) differentially expressed between classical and pigmentary phenotypes of pseudoexfoliation with heat map of specific miRNA predicted KEGG pathway using mirPath (C).

Figure S2: Downstream targets of SMADs (a) and TGF beta pathway related effectors (b, c) differentially expressed between classical and pigmentary phenotypes of pseudoexfoliation.

Figure S3: Gel pictures of housekeeping genes in miRNA obtained from serum and PBMC samples from patients with pseudoexfoliation.

Table S1: Novel miRNA related to TGF pathway with targeted functions patients with pseudoexfoliation phenotypes.

Table S2: Fibrosis miRNA related to protein processing with targeted functions of patients with pseudoexfoliation phenotypes.

Supplemental data: Workflow of patients included into different phases of the study

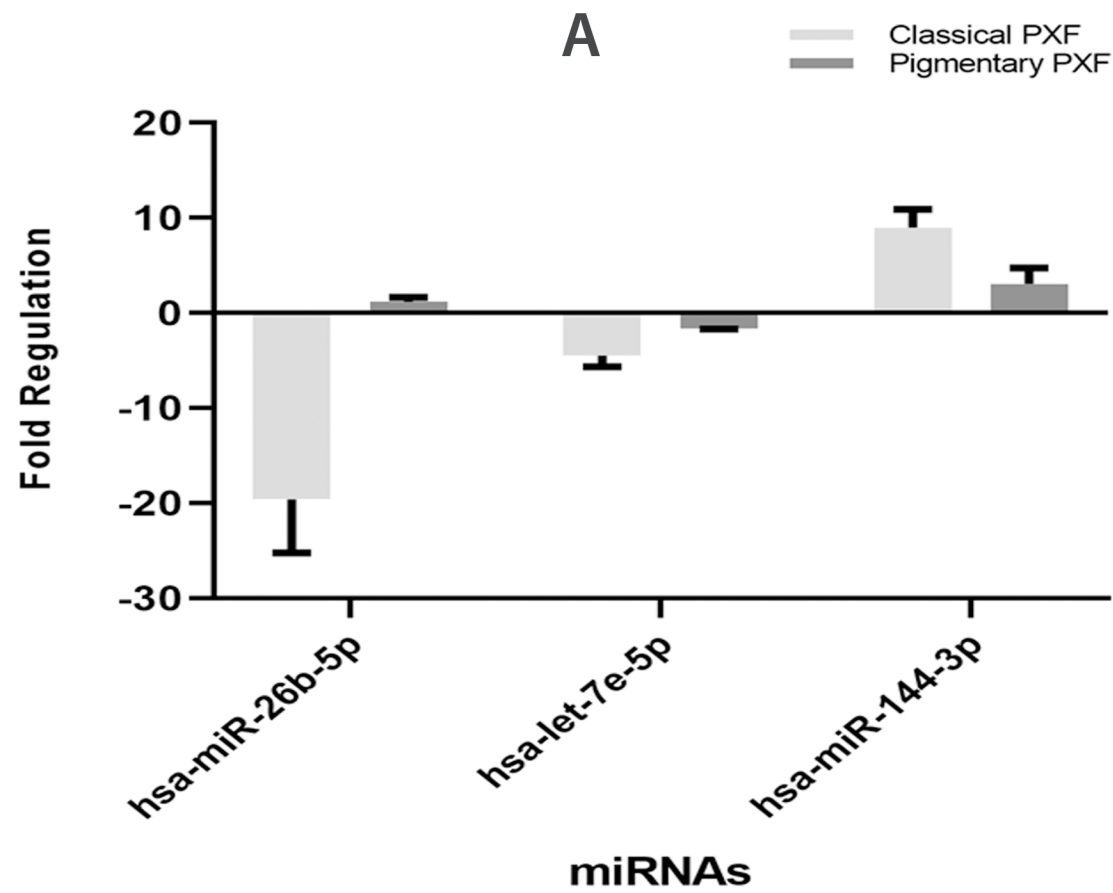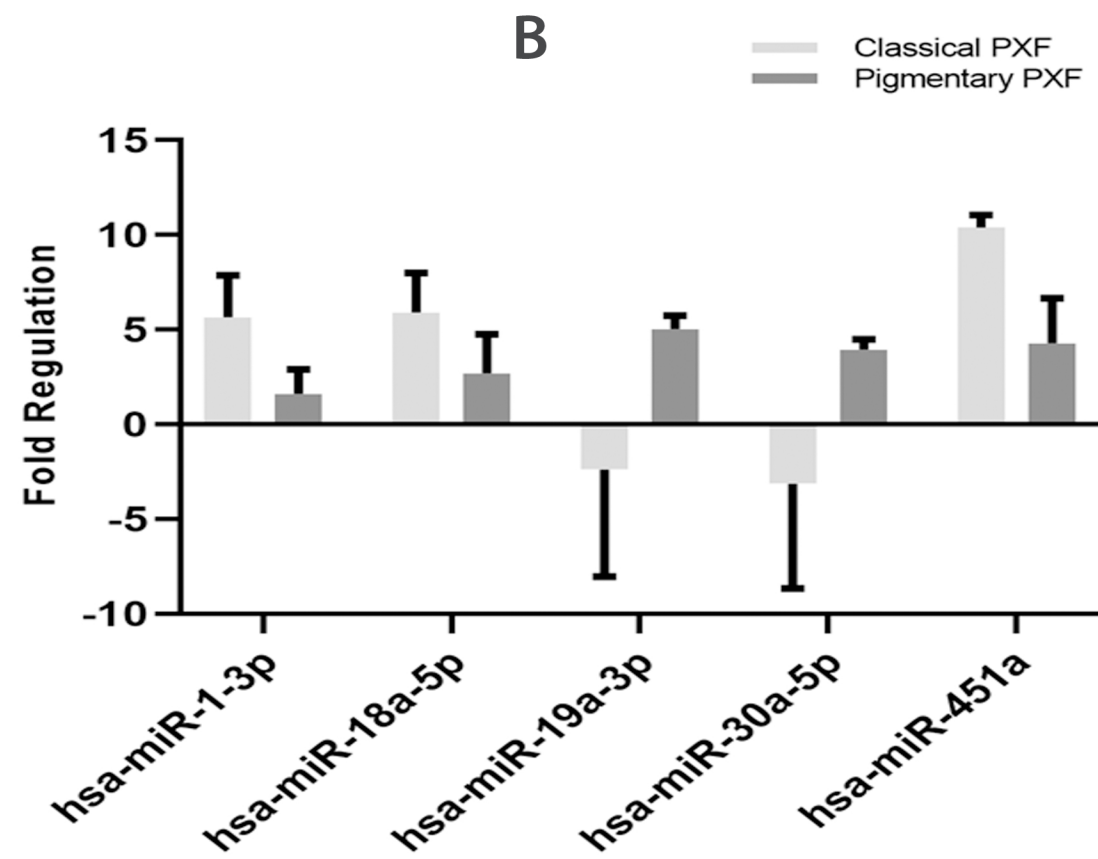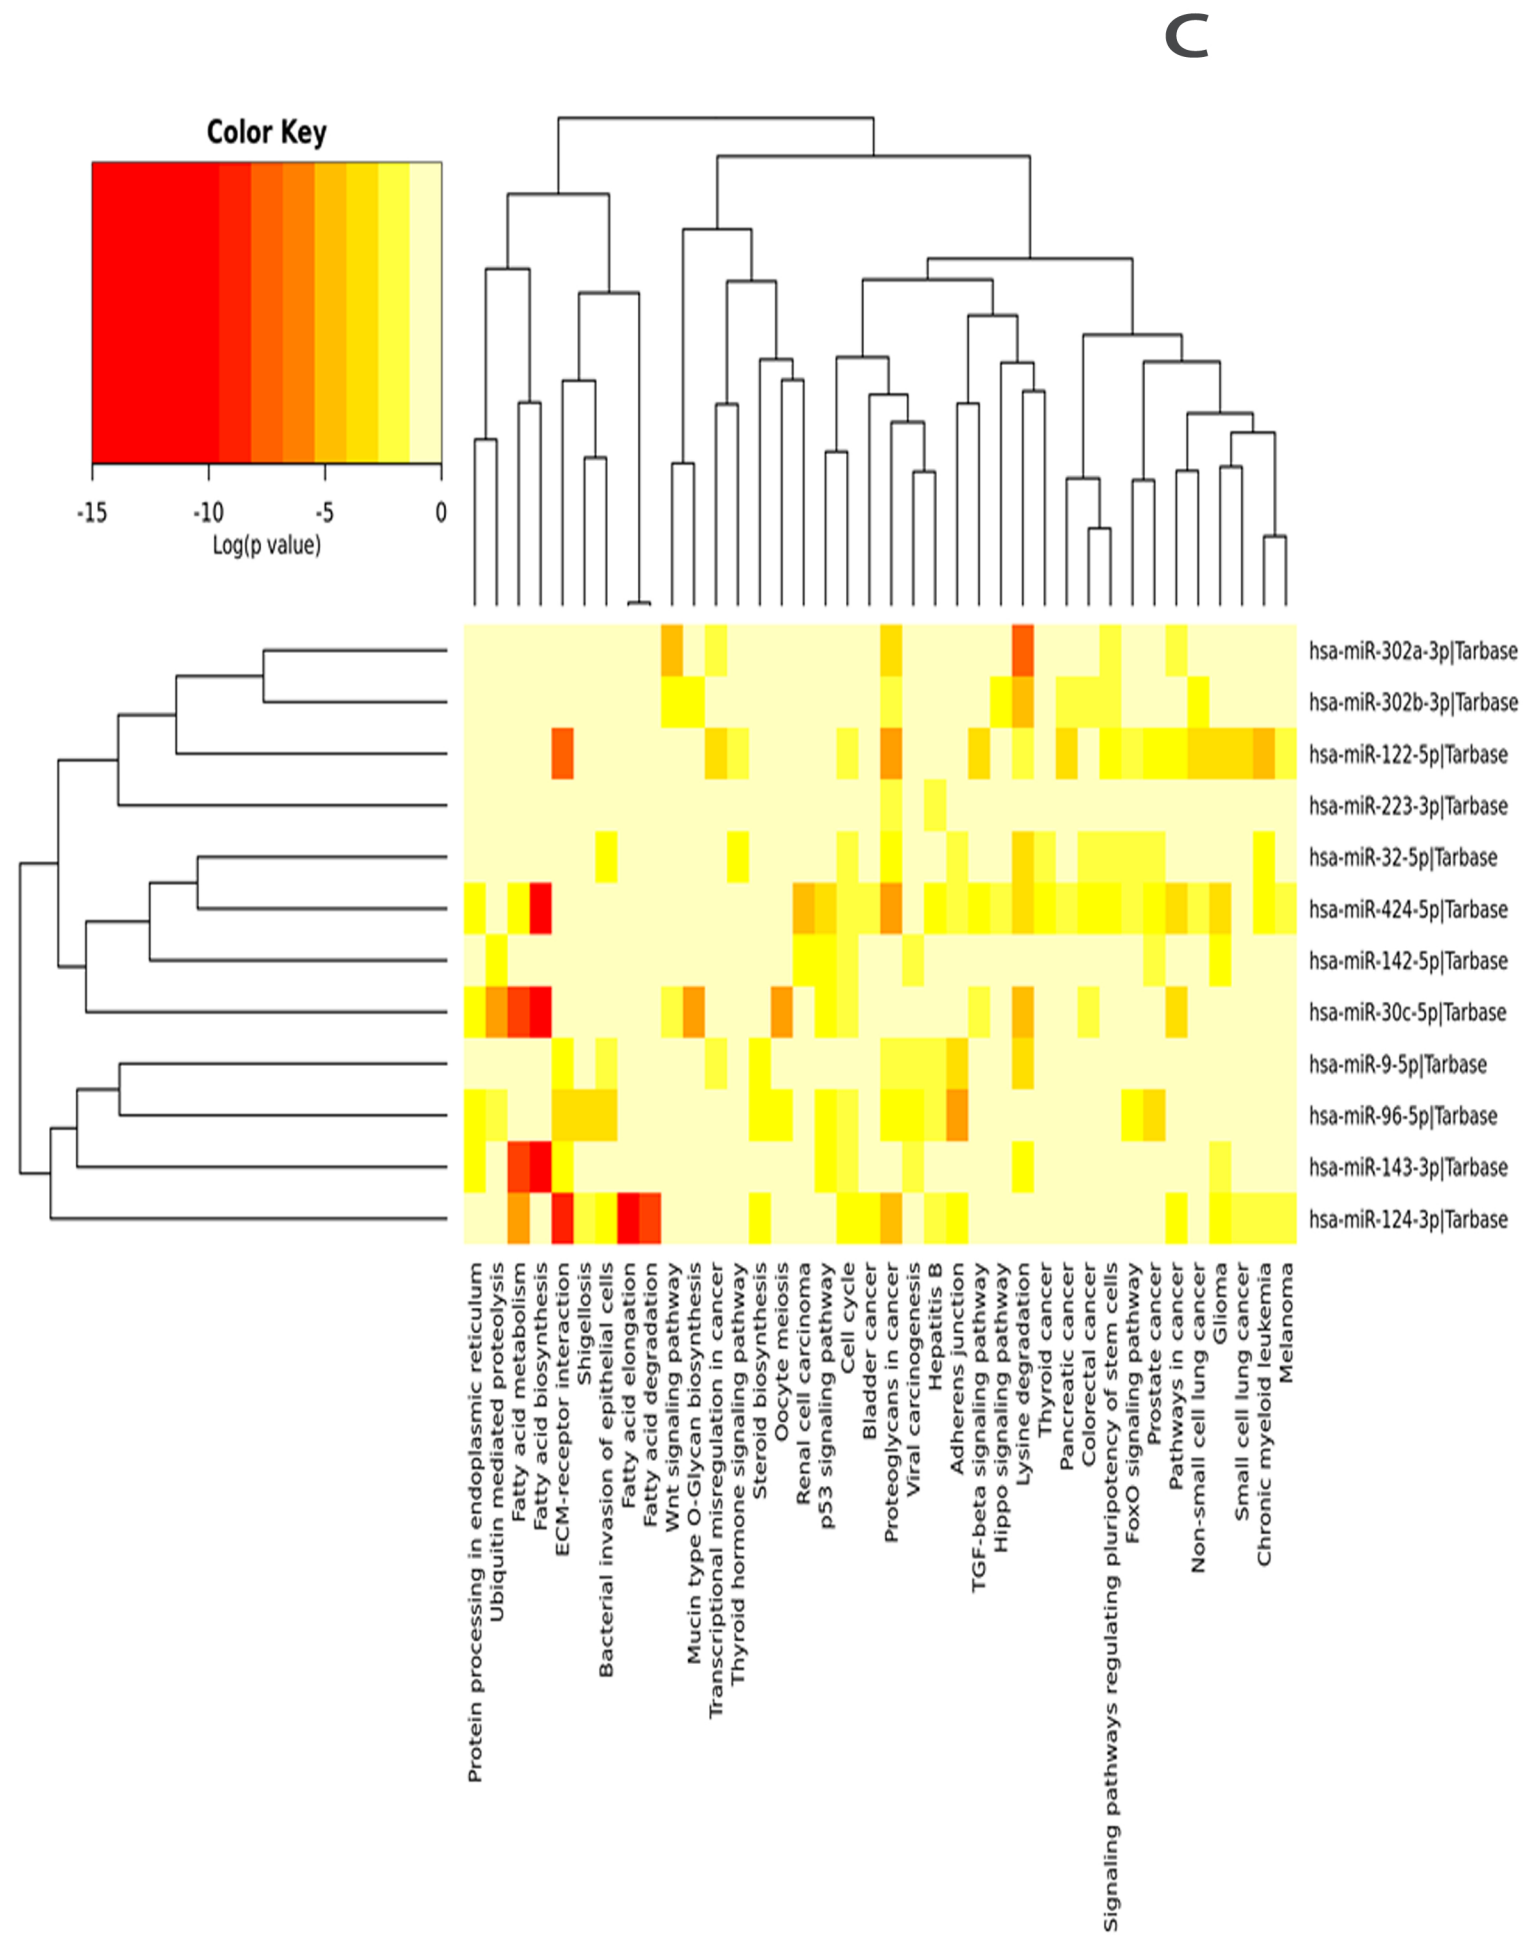

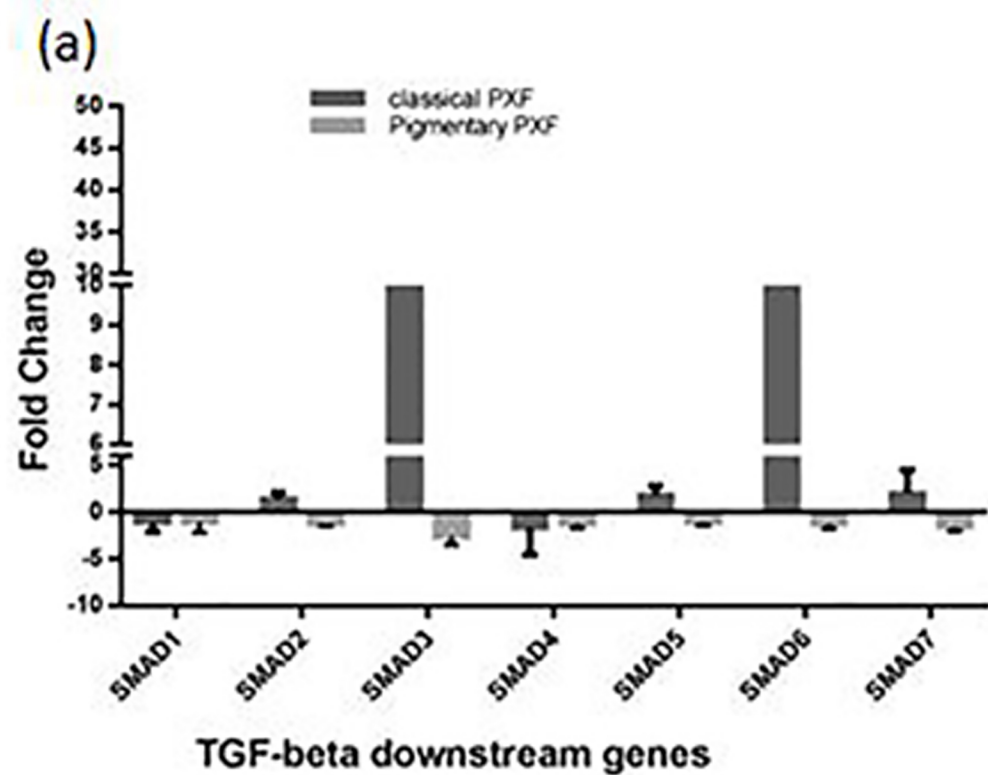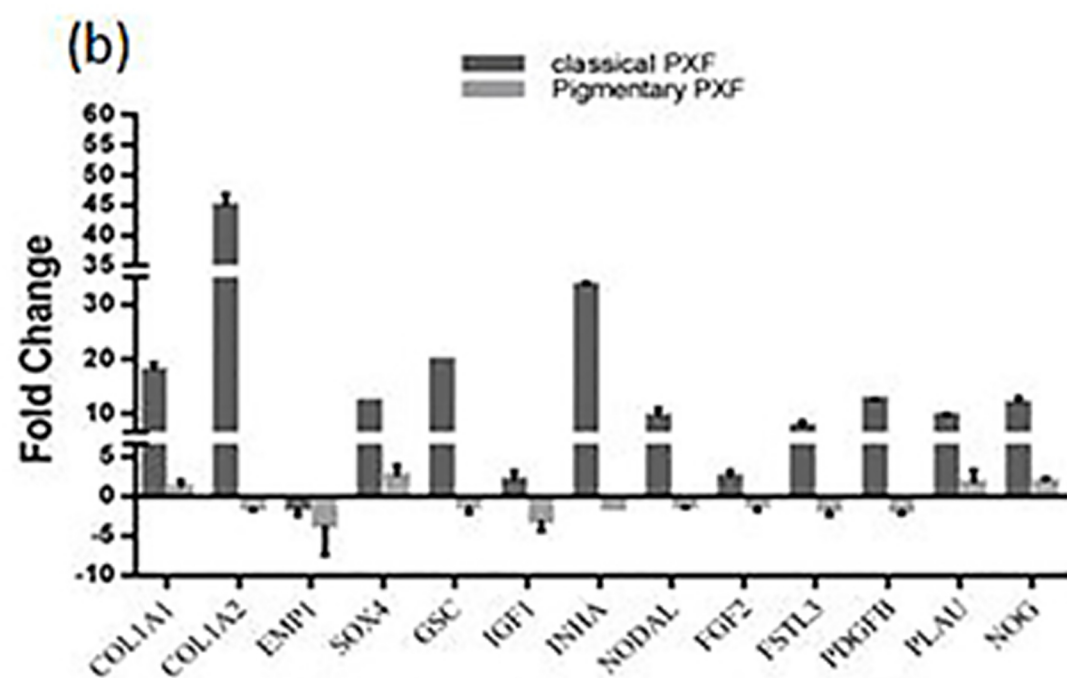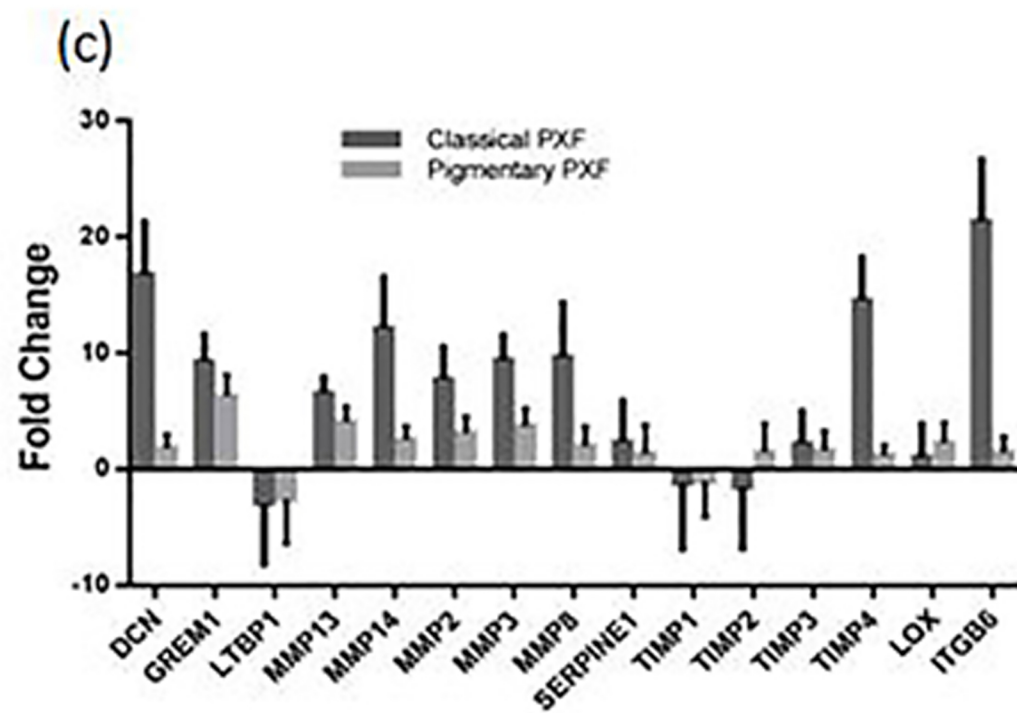

M

PBMC SNORD 68

Serum SNORD 68

PBMC 122-5p

Serum 122-5p

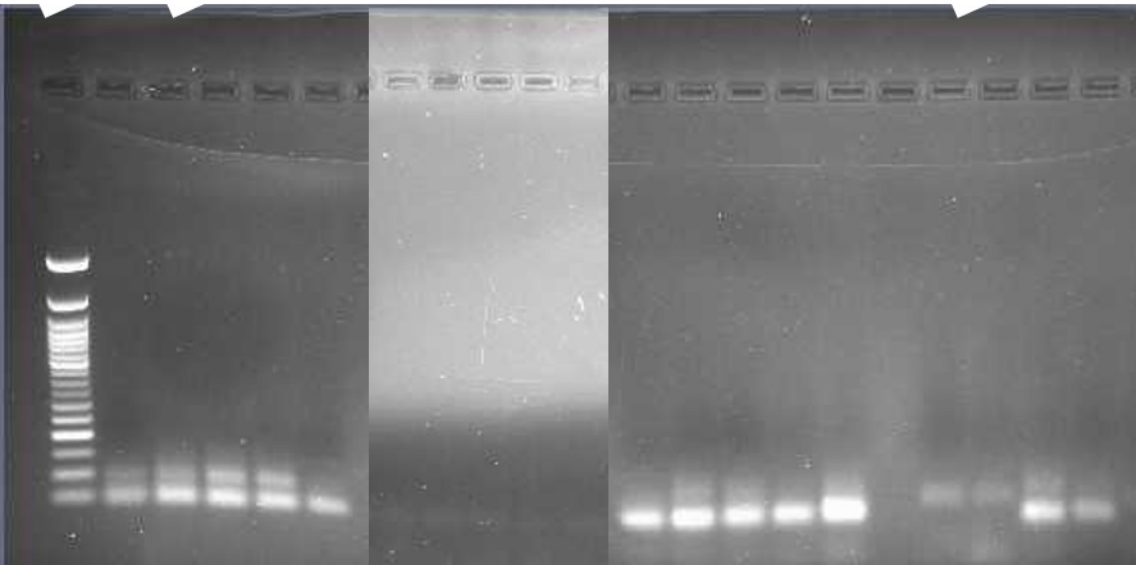

Table S1: Predicted targeted functions of novel miRNA related to TGF pathway in patients with pseudoexfoliation phenotypes.

| Id of miRNA (mifinder) phenotypes | <b>TGF pathway (n=32 genes)</b> | Accession numbers | Function                                                                        |
|-----------------------------------|---------------------------------|-------------------|---------------------------------------------------------------------------------|
| hsa-miR-26b-5p                    | 21                              | MIMAT000083       | Positive <b>regulation of tau-protein kinase activity and apoptotic pathway</b> |
| hsa-let-7e-5p                     | 19                              | MIMAT000066       | Posttranslational gene silencing, <b>extracellular space homeostasis</b>        |
| hsa-miR-144-3p                    | 1                               | MIMAT0000436      | regulation of cholesterol efflux                                                |

Table S2: Targeted functions of fibrosis miRNA related to protein processing in patients with pseudoexfoliation phenotypes.

| Id of miRNA mifibrosis phenotypes | <b>Proteoglycan pathway (n=69 genes)</b> | Protein processing in ER/RNA transport (n=36) | Accession numbers | Function                                                                                                             |
|-----------------------------------|------------------------------------------|-----------------------------------------------|-------------------|----------------------------------------------------------------------------------------------------------------------|
| hsa-miR-30a-5p                    | 39                                       | 36                                            | MIMAT0000087      | Negative regulation of apoptosis and posttranscriptional gene silencing                                              |
| hsa-miR-1-3p                      | 44                                       | 0                                             | MIMAT0000416      | Regulation of sequestered calcium release by sarcoplasmic reticulum                                                  |
| hsa-miR-19a-3p                    | 44                                       |                                               | MIMAT0000073      | Negative regulation of TLL-like receptor signaling pathway, gene silencing                                           |
| hsa-miR-18a-5p                    | -                                        | -                                             | MIMAT0000072      | Negative regulation of sprouting angiogenesis and positive regulation of vascular smooth muscle cell differentiation |
| hsa-miR-451a                      | -                                        | -                                             | MI0001729         | Domain for CXCL16                                                                                                    |

Screening n=94

Excluded 44

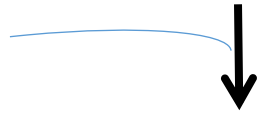

**Out of 50 included-Samples used for standardisations to offset variability from**  
Mirna extr: SNORD 68 : miRNA 122 reproducibility of SNORD68 and miRNA 122-5

|     |   |   |            |   |
|-----|---|---|------------|---|
| PXF | 5 | 6 | 4          | 2 |
| PXG | 5 | 6 | 4          | 3 |
|     |   |   | Total=n=35 |   |

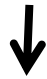

Discovery stage-mFINDER array

|                     |   |
|---------------------|---|
| controls            | 3 |
| Classical PXF       | 3 |
| Pigmentary PXF      | 3 |
| Ocular hypertension | 3 |
| PXG                 | 3 |

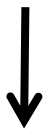

Validation Stage-miRNA and TGF downstream targets

|                     |                 |
|---------------------|-----------------|
| controls            | 3               |
| Classical PXF       | 3               |
| Pigmentary PXF      | 3               |
| Ocular hypertension | 3               |
| PXG                 | 3               |
|                     | Serum TGF ELISA |
| Classical PXF       | 5               |
| Ocular hypertension | 5               |
| PXG                 | 5               |
| controls            | 5               |

Total n=50
